# Supplementary material for: Potential Application of Discarded Natural Coal Gangue for the Removal of Tetracycline Hydrochloride (TC) from an Aqueous Solution
Source: MDPI journal article supplement (doi:10.3390/toxics11010020), 2022-12-26
Supplement: s1 [file s1]

## Supplementary Materials

# Potential Application of Discarded Natural Coal Gangue for the Removal of Tetracycline Hydrochloride (TC) from an Aqueous Solution

Hongyou Wan <sup>1,2</sup>, Chen Wang <sup>1</sup>, Lin Gong <sup>1</sup>, Xinfeng Zhu <sup>3</sup>, Jingwei Yan <sup>1</sup>, Jiajia Lu <sup>1</sup> and Wei Zhang <sup>1,2,3,4,5,6,7,\*</sup>

<sup>1</sup> School of Ecology and Environment, Zhengzhou University, Zhengzhou 450001, China

<sup>2</sup> Research Centre of Engineering and Technology for Synergetic Control of Environmental Pollution and Carbon Emissions of Henan Province, Zhengzhou 450001, China

<sup>3</sup> Henan Key Laboratory of Water Pollution Control and Rehabilitation Technology, Pingdingshan 467036, China

<sup>4</sup> Zhengzhou Key Laboratory of Water Resource and Environment, Zhengzhou 450001, China

<sup>5</sup> Yellow River Institute for Ecological Protection and Regional Coordination Development, Zhengzhou University, Zhengzhou 450001, China

<sup>6</sup> Henan International Joint Laboratory of Water Cycle Simulation and Environmental Protection, Zhengzhou 450001, China

<sup>7</sup> Henan Key Laboratory of Water Resources Conservation and Intensive Utilization in the Yellow River Basin, Zhengzhou 450001, China

\* Correspondence: zhangwei88@zzu.edu.cn

Number of pages: 5

Number of Texts: 2

Number of Tables: 3

Number of Figures: 2

## Supplementary captions

**Text S1** TC desorption from the exhausted CG

**Text S2** The CG recycling process and the results

**Table S1** The elemental compositions of the raw CG

**Table S2** The detailed parameters for adsorption kinetics and isotherms model of TC by CG

**Table S3** BET parameters of CG before and after TC adsorption.

**Figure S1** The desorption for TC of exhausted CG.

**Figure S2** The XPS spectra of the raw and used CG.

**Text S1** TC desorption from the exhausted CG

The used CG after TC adsorption process was firstly filtered and dried under natural conditions for 3 h. Then, the used CG (1 g/L) was added into deionized water in the erlenmeyer flask (100 mL). The slurry was mixed by water bath oscillator (120 rpm and 25°C), and the samples (3 mL) was withdrawn from the slurry at time intervals of 0.17, 0.5, 1, 2, 3, 3.5, 4, 5, 6, 12, and 24 h. The withdrawn samples were quickly filtered and measured the released TC concentrations.

**Text S2** The CG recycling process and the results

The used CG after TC adsorption process was firstly filtered and dried under natural conditions for 3 h. Then, the used CG (1 g/L) was added into TC (40 mg/L, 50 mL) in the erlenmeyer flask (100 mL). The slurry was mixed by water bath oscillator (120 rpm and 25°C), and the samples (3 mL) was withdrawn from the slurry at equilibrate time of 3h. The withdrawn samples were quickly filtered and measured the residual TC concentrations.

**Table S1** The elemental compositions of the raw CG

| Elements | Elements Content (%) |
|----------|----------------------|
| Al       | 12.7419              |
| As       | 0.0037               |
| Ba       | 0.0906               |
| Ca       | 6.6808               |
| Cl       | 0.0670               |
| Cr       | 0.0479               |
| Cu       | 0.0060               |
| Fe       | 3.3760               |
| Ga       | 0.0030               |
| K        | 2.2417               |
| Mg       | 0.8522               |
| Mn       | 0.0471               |
| Na       | 0.4297               |
| Ni       | 0.0246               |
| P        | 0.0557               |
| Rb       | 0.0103               |

|    |         |
|----|---------|
| Si | 25.0436 |
| S  | 0.7195  |
| Sr | 0.0523  |
| Ti | 0.6653  |
| Zn | 0.0170  |
| Zr | 0.0200  |

**Table S2** The detailed parameters for adsorption kinetics and isotherms of TC by CG.

|                             |                                     | Parameter 1                                                | Parameter 2                 | R <sup>2</sup> |
|-----------------------------|-------------------------------------|------------------------------------------------------------|-----------------------------|----------------|
| Adsorption kinetics         | Quasi first order kinetic equation  | $K_1=2.6366 \text{ (1/h)}$                                 | $Q_e=12.48 \text{ (mg/g)}$  | 0.919          |
|                             | Quasi second order kinetic equation | $K_2=0.3372 \text{ (g/(mg·h))}$                            | $Q_e=13.194 \text{ (mg/g)}$ | 0.973          |
| Adsorption isotherms (25°C) | Langmuir                            | $K_L=0.01998 \text{ (L/mg)}$                               | $Q_m=37.106 \text{ (mg/g)}$ | 0.997          |
|                             | Freundlich                          | $K_F=2.611 \text{ (mg}^{(1-n)} \cdot \text{L}^n/\text{g)}$ | $n=2.04$                    | 0.972          |
| Adsorption isotherms (35°C) | Langmuir                            | $K_L=0.02985 \text{ (L/mg)}$                               | $Q_m=40.540 \text{ (mg/g)}$ | 0.998          |
|                             | Freundlich                          | $K_F=4.375 \text{ (mg}^{(1-n)} \cdot \text{L}^n/\text{g)}$ | $n=2.35$                    | 0.957          |
| Adsorption isotherms (45°C) | Langmuir                            | $K_L=0.03769 \text{ (L/mg)}$                               | $Q_m=45.800 \text{ (mg/g)}$ | 0.995          |
|                             | Freundlich                          | $K_F=5.927 \text{ (mg}^{(1-n)} \cdot \text{L}^n/\text{g)}$ | $n=2.15$                    | 0.972          |

**Table S3** BET parameters of CG before and after TC adsorption.

| Properties                                            | Samples               |                       |
|-------------------------------------------------------|-----------------------|-----------------------|
|                                                       | Before TC adsorption  | After TC adsorption   |
| BET Surface Area ( $\text{m}^2 \text{ g}^{-1}$ )      | 5                     | 2                     |
| $V_m$ ( $\text{cm}^3(\text{STP}) \text{ g}^{-1}$ )    | $1.63 \cdot 10^{-3}$  | $6.00 \cdot 10^{-4}$  |
| Total pore volume ( $\text{cm}^3 \text{ g}^{-1}$ )    | $19.16 \cdot 10^{-3}$ | $13.28 \cdot 10^{-3}$ |
| Mean pore diameter (nm)                               | 15.48                 | 18.57                 |
| Langmuir surface area ( $\text{m}^2 \text{ g}^{-1}$ ) | 4.23                  | 0.99                  |
| BJH surface area ( $\text{m}^2 \text{ g}^{-1}$ )      | 1.78                  | 0.65                  |

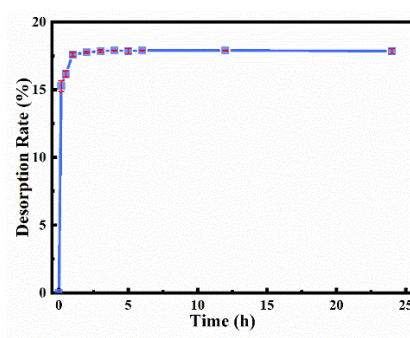

**Figure S1.** The desorption for TC of exhausted CG (CG dosage of 1 g/L, pH of 7.0, contact temperature of 25 °C, deionized water volume of 50 mL, and stirring speed of 120 rpm).

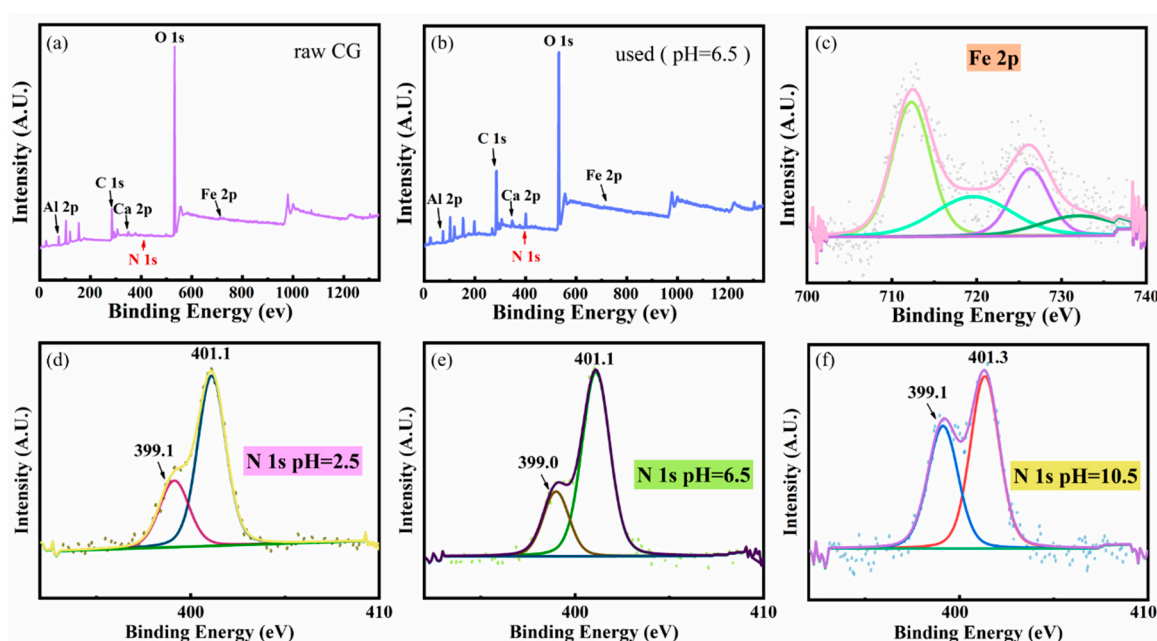

**Figure S2.** The XPS spectra of the raw and used CG: (a) full-range scan of the raw CG; (b) full-range scan of the used CG (at pH of 6.2); (c) Fe 2p XPS spectra of the raw CG, (d-f) N 1s XPS spectra of the used CG under different pH (pH=2.5, Natural=6.2, pH=10.5).

The XPS survey spectra confirms the existence of Fe, Ca, and Al in the original CG (Figure S2 a). The peak observed at 712.0 eV was related to the hybrid orbital of Fe 2p<sub>3/2</sub> [36, 66]. The peak observed at 726.5 eV was correlated to the Fe 2p<sub>3/2</sub> in the CG (Figure S2 c) [67] and the satellite at 719 eV. The peaks at 712.0 eV, 726.5 eV, and 719 eV were related to the valence state of Fe(III) in Fe<sub>2</sub>O<sub>3</sub>, confirming the existence of Fe<sub>2</sub>O<sub>3</sub> in CG [67]. The iron and iron oxides in CG revealed its potential for magnetic recovery after TC adsorption process. The XPS spectra of the CG before and after TC removal process at different pHs were measured. The N (400 eV) peaks in Figure S2 b confirmed the adsorption to TC by CG. The peak observed at around 399.0 eV in Figure S2 (d-f) were related to the dimethylamino group [68]. Compared with pH of 2.5 and 6.2, the CG collected after adsorption of TC at pH of 10.5 was possessing increased dimethylamino group, attributed to the TC deprotonation at higher pH condition. At higher pH condition, part of TC<sup>2-</sup> were adsorbed on the surface of CG.
